# Supplementary material
Source: publisher figshare collection journal article supplement (https://tandf.figshare.com/articles/dataset/_/1456234)
Supplement: Supplementary file 1 [file 2]

*Ganguroo robustiter* sp. nov. (Macropodoidea, Marsupialia), a middle to early late Miocene basal macropodid from Riversleigh World Heritage Area,  
Australia

BERNARD N. COOKE, KENNY J. TRAVOUILLO, MICHAEL ARCHER, and SUZANNE J. HAND

Journal of Vertebrate Paleontology

SUPPLEMENTARY DATA 1

TABLE S1. Measurements of the lower dentition of type and referred material of *Ganguroo robustiter* in mms. L = anteroposterior length, AW = anterior width, PW = posterior width, dp = deciduous premolar, p = premolar, m = molar.

| Specimen | Riversleigh Locality   | dp2  |      | dp3  |      | p3   |      | m1   |      |      | m2   |      |      | m3   |      |      | m4   |      |      |
|----------|------------------------|------|------|------|------|------|------|------|------|------|------|------|------|------|------|------|------|------|------|
|          |                        | L    | W    | L    | W    | L    | W    | L    | AW   | PW   |
| QMF36338 | AL90 Site              | 4.28 | 2.73 | 3.8  | 2.56 |      |      | 4.18 | 2.79 | 2.99 | 4.39 | 3.15 | 3.3  |      |      |      |      |      |      |
| QMF36338 | AL90 Site              | 4.29 | 2.88 | 3.54 | 2.53 |      |      | 4.01 | 2.75 | 3.12 | 4.38 | 3.25 | 3.59 |      |      |      |      |      |      |
| QMF40114 | AL90 Site              |      |      |      |      | 6.92 | 3.86 | 4.16 | 3.1  | 3.15 | 4.43 | 3.42 | 3.4  | 4.39 | 3.49 | 3.4  | 4.6  | 3.43 | 3.06 |
| QMF40114 | AL90 Site              |      |      |      |      | 6.98 | 3.5  | 3.93 | 3.07 | 3.26 | 4.35 | 3.58 | 3.54 | 4.36 | 3.7  | 3.42 | 4.44 | 3.38 | 3.09 |
| QMF30845 | AL90 Site              |      |      |      |      |      |      |      |      |      | 4.26 | 3.17 | 3.06 |      |      |      |      |      |      |
| QMF30845 | AL90 Site              | 3.59 | 3.22 | 3.7  | 2.53 |      |      | 3.96 | 2.83 | 2.95 | 4.25 | 3.3  | 3.3  |      |      |      |      |      |      |
| QMF56311 | AL90 Site              | 4.67 | 3.09 | 3.67 | 2.62 |      |      | 4.06 | 3    | 3.03 | 4.2  | 3.53 | 3.25 | 4.62 | 3.73 | 3.49 |      |      |      |
| QMF41249 | AL90 Site              |      |      |      |      | 7    | 3.43 | 4.18 | 3.14 | 3.16 | 4.15 | 3.47 | 3.41 | 4.5  | 3.66 | 3.57 | 4.55 | 3.47 | 3.07 |
| QMF36331 | AL90 Site              |      |      |      |      | 7.66 | 4.01 |      |      |      |      |      |      |      |      |      |      |      |      |
| QMF56309 | AL90 Site              |      |      |      |      | 7.46 | 3.39 | 4.23 | 3.06 | 3.09 | 4.44 | 3.38 | 3.39 | 4.93 | 3.52 | 3.78 | 4.78 | 3.42 | 3.04 |
| QMF56298 | AL90 Site              |      |      |      |      |      |      | 4.32 | 2.72 | 2.99 |      |      |      |      |      | 3.06 |      |      |      |
| QMF56298 | AL90 Site              | 4.05 | 2.71 | 3.3  | 2.59 |      |      | 3.93 | 2.96 | 3.01 | 4.2  | 3.29 | 3.18 | 4.32 | 3.29 | 3.15 |      |      |      |
| QMF50420 | AL90 Site              |      |      |      |      | 7.56 | 4.12 | 4.37 | 3.15 | 3.29 | 4.96 | 3.76 | 3.75 | 5.09 | 3.87 | 3.73 | 5.19 | 3.72 | 3.16 |
| QMF56317 | Angela's Sinkhole site |      |      |      |      | 8.07 | 3.91 |      |      |      |      |      |      |      |      |      |      |      |      |
| QMF56317 | Angela's Sinkhole site |      |      |      |      | 7.98 | 4.22 | 4.08 | 3.68 | 3.81 | 3.86 | 3.9  | 3.46 | 4.84 | 3.62 | 3.46 |      |      |      |
| QMF30539 | Arachnid Ridge Site    |      |      |      |      | 6.96 | 3.39 |      |      |      |      |      |      |      |      |      |      |      |      |
| QMF52810 | Dome Site              |      |      |      |      | 6.77 | 3.45 | 4.26 | 2.98 | 3.14 | 4.4  | 3.54 | 3.33 | 4.82 | 3.62 | 3.43 | 4.83 | 3.64 | 3.25 |
| QMF23778 | Encore Site            |      |      |      |      |      |      | 4.46 | 3    | 3.18 |      |      |      |      |      |      |      |      |      |
| QMF30535 | Encore Site            |      |      |      |      |      |      |      |      |      | 4.53 | 3.42 | 3.11 | 5.09 | 3.41 | 3.19 |      |      |      |
| QMF23782 | Encore Site            |      |      |      |      |      |      |      |      |      | 4.65 | 3.47 | 3.32 | 5.13 | 3.81 | 3.61 |      |      |      |
| QMF55107 | Encore Site            |      |      | 3.92 | 2.82 |      |      |      |      |      |      |      |      |      |      |      |      |      |      |
| QMF55105 | Encore Site            |      |      |      |      |      |      |      |      |      |      |      |      | 5.61 | 4.3  | 4.2  |      |      |      |
| QMF56312 | Encore Site            |      |      |      |      | 8.58 | 3.75 |      |      |      |      |      |      |      |      |      |      |      |      |
| QMF57006 | Gag Site               |      |      |      |      | 7.23 | 3.94 | 4.07 | 3.06 | 3.09 | 4.49 | 3.56 | 3.34 |      |      |      |      |      |      |
| QMF57007 | Gag Site               |      |      |      |      | 8.1  | 4.02 | 4.08 | 3.13 | 3.32 | 4.46 | 3.53 | 3.6  | 4.7  | 3.58 | 3.64 |      | 3.53 |      |
| QMF57002 | Gag Site               |      |      |      |      | 6.85 | 3.36 | 3.97 | 2.77 | 2.98 | 4.31 | 3.22 |      | 4.44 | 3.26 | 3.13 | 4.43 | 2.89 | 2.73 |

TABLE S1. (Continued)

| Specimen | Riversleigh Locality | dp2  |      | dp3  |      | p3   |      | m1   |      |      | m2   |      |      | m3   |      |      | m4   |      |      |
|----------|----------------------|------|------|------|------|------|------|------|------|------|------|------|------|------|------|------|------|------|------|
|          |                      | L    | W    | L    | W    | L    | W    | L    | AW   | PW   |
| QMF20527 | Gag Site             |      |      |      |      |      |      | 3.93 | 2.96 | 3.2  | 4.4  | 3.34 | 3.41 | 4.78 | 3.67 | 3.75 | 4.94 | 3.64 | 3.27 |
| QMF23836 | Gag Site             | 4.28 | 3.02 | 3.84 | 2.95 |      |      | 4.07 | 3.08 | 3.22 | 4.43 | 3.17 | 3.37 |      |      |      |      |      |      |
| QMF19583 | Gag Site             |      |      |      |      | 6.96 | 3.77 | 3.96 | 3.18 | 3.32 | 4.27 | 3.64 | 3.55 | 4.52 | 3.78 | 3.53 |      |      |      |
| QMF20350 | Gag Site             |      |      |      |      |      |      |      |      |      |      |      |      |      |      |      | 5.15 | 3.6  | 3.61 |
| QMF20335 | Gag Site             |      |      |      |      |      |      | 4.14 | 3.22 | 3.47 |      |      |      |      |      |      |      |      |      |
| QMF20344 | Gag Site             |      |      |      |      |      |      | 4.03 | 2.92 | 3.23 |      |      |      |      |      |      |      |      |      |
| QMF20329 | Gag Site             |      |      |      |      |      |      | 4.1  | 2.94 | 3.13 |      |      |      |      |      |      |      |      |      |
| QMF20330 | Gag Site             |      |      |      |      |      |      |      |      |      | 4.57 | 3.44 | 2.99 |      |      |      |      |      |      |
| QMF20328 | Gag Site             |      |      |      |      | 6.88 |      |      |      |      | 4.4  | 3.28 | 3.17 |      |      |      |      |      |      |
| QMF56299 | Gag Site             |      |      |      |      |      |      |      |      |      | 3.99 | 3.34 | 3.19 | 4.19 | 3.42 | 3.15 | 4.12 | 3.16 | 2.49 |
| QMF56300 | Gag Site             | 4.38 | 3.31 | 4.25 | 2.94 |      |      |      |      |      |      |      |      |      |      |      |      |      |      |
| QMF56308 | Gag Site             | 3.43 | 2.35 | 3.14 | 2.73 | 6.44 |      | 4.21 | 2.94 | 3.17 |      |      |      |      |      |      |      |      |      |
| QMF56306 | Gag Site             |      |      |      |      |      |      |      |      |      |      |      |      |      |      |      | 4.94 | 3.51 | 3.43 |
| QMF56303 | Gag Site             |      |      |      |      | 6.86 | 3.86 | 3.9  | 2.78 | 3.08 | 4.37 | 3.51 | 3.47 | 4.4  | 3.46 | 3.26 |      |      |      |
| QMF56304 | Gag Site             |      |      |      |      | 7.01 | 3.66 |      |      |      | 4.56 | 3.35 | 3.52 |      |      |      |      |      |      |
| QMF56302 | Gag Site             |      |      |      |      | 6.54 | 3.51 |      |      |      |      |      |      |      |      |      |      |      |      |
| QMF56305 | Gag Site             | 4.39 | 3.33 | 4.58 | 3.52 | 7.03 |      | 4.12 | 3.11 | 3.3  | 4.38 | 3.36 | 3.45 | 4.75 |      |      |      |      |      |
| QMF31346 | Golden Steph Site    |      |      |      |      | 6.31 | 3.12 | 3.97 | 2.76 | 2.91 | 4.02 | 3.2  | 3.13 | 4.37 | 3.46 | 3.22 | 4.49 | 3.47 | 3.14 |
| QMF39855 | Golden Steph Site    |      |      |      |      | 7.55 | 3.57 | 3.69 | 2.97 | 3.03 | 3.96 | 3.23 | 3.26 | 4.03 | 3.42 | 3.21 | 4    | 3.15 | 2.66 |
| QMF57000 | Henk's Hollow Site   |      |      |      |      | 7.27 | 3.56 | 4.09 | 3.08 | 2.98 | 4.43 | 3.52 | 3.37 | 4.61 | 3.51 | 3.44 | 4.62 | 3.31 | 2.91 |
| QMF57003 | Henk's Hollow Site   |      |      |      |      | 6.99 | 3.33 | 4.12 | 2.71 | 3.11 | 4.14 | 3.15 | 3.25 | 4.21 | 3.36 | 3.12 | 4.43 | 3.07 | 2.81 |
| QMF57001 | Henk's Hollow Site   |      |      |      |      |      |      | 4.38 | 3.16 | 3.2  | 4.46 | 3.31 | 3.51 | 4.98 | 3.36 | 3.16 |      |      |      |
| QMF57008 | Henk's Hollow Site   |      |      | 3.81 | 2.33 |      |      |      |      |      | 4.2  | 3.06 | 3.01 |      |      |      |      |      |      |
| QMF20457 | Henk's Hollow Site   | 3.74 | 2.74 | 3.67 | 2.64 |      |      |      |      |      |      |      |      |      |      |      |      |      |      |
| QMF20383 | Henk's Hollow Site   |      |      |      |      | 7.29 | 3.29 |      |      |      |      |      |      |      |      |      |      |      |      |
| QMF20262 | Henk's Hollow Site   |      |      | 4    | 2.97 | 7.36 |      | 4.14 | 3.18 | 3.36 | 4.59 | 3.6  | 3.51 | 5.15 | 3.82 | 3.71 |      |      |      |
| QMF20501 | Henk's Hollow Site   |      |      |      |      |      |      |      |      |      | 4.7  | 3.26 | 3.45 | 5.12 | 3.48 | 3.5  |      |      |      |

TABLE S1. (Continued)

| Specimen | Riversleigh Locality      | dp2 |   | dp3 |   | p3   |      | m1   |      |      | m2   |      |      | m3   |      |      | m4   |      |      |
|----------|---------------------------|-----|---|-----|---|------|------|------|------|------|------|------|------|------|------|------|------|------|------|
|          |                           | L   | W | L   | W | L    | W    | L    | AW   | PW   |
| QMF20421 | Henk's Hollow Site        |     |   |     |   | 7.19 | 3.52 |      |      |      |      |      |      |      |      |      |      |      |      |
| QMF23531 | Jim's Carousel Site       |     |   |     |   |      |      |      |      |      | 4.66 | 3.61 | 3.62 | 5.08 | 3.71 | 3.74 |      |      |      |
| QMF24187 | Jim's Carousel Site       |     |   |     |   | 7.15 | 3.91 | 4.2  | 2.95 | 3.16 | 4.27 | 3.25 | 3.33 | 4.45 | 3.36 | 3.36 |      |      |      |
| QMF52801 | Keith's Chocky Block Site |     |   |     |   |      |      |      |      |      |      |      |      |      |      |      |      |      |      |
| QMF52800 | Keith's Chocky Block Site |     |   |     |   | 6.49 | 3.35 | 3.89 | 2.62 | 2.72 | 4.04 | 3    | 2.89 | 3.91 | 3.15 | 3.08 | 4.15 | 3.15 | 2.89 |
| QMF52799 | Keith's Chocky Block Site |     |   |     |   |      |      |      |      |      | 4.47 | 3.38 | 3.35 | 4.98 | 3.25 | 2.97 |      |      |      |
| QMF52798 | Keith's Chocky Block Site |     |   |     |   |      |      |      |      |      | 4.01 | 2.91 | 2.93 | 4.08 | 3.08 | 3.07 |      |      |      |
| QMF57013 | Keith's Chocky Block Site |     |   |     |   |      |      |      |      |      | 4.47 | 3.17 | 3.15 |      |      |      |      |      |      |
| QMF57015 | Keith's Chocky Block Site |     |   |     |   |      |      |      |      |      | 4.55 | 3.15 | 3.16 |      |      |      |      |      |      |
| QMF57014 | Keith's Chocky Block Site |     |   |     |   |      |      |      |      |      | 4.37 | 3.12 | 3.18 |      |      |      |      |      |      |
| QMF57016 | Keith's Chocky Block Site |     |   |     |   |      |      |      |      |      | 4.41 | 3.12 | 3.08 |      |      |      |      |      |      |
| QMF57017 | Keith's Chocky Block Site |     |   |     |   |      |      |      |      |      | 4.51 | 3.34 | 2.99 |      |      |      |      |      |      |
| QMF57018 | Keith's Chocky Block Site |     |   |     |   |      |      |      |      |      | 4.4  | 3.25 | 2.82 |      |      |      |      |      |      |
| QMF57019 | Keith's Chocky Block Site |     |   |     |   |      |      |      |      |      | 4.52 | 3.16 | 3.06 |      |      |      |      |      |      |
| QMF57012 | Keith's Chocky Block Site |     |   |     |   |      |      | 3.98 | 2.48 | 2.82 |      |      |      |      |      |      |      |      |      |
| QMF30789 | Keith's Chocky Block Site |     |   |     |   | 7.49 | 3.39 | 4.4  | 3.07 | 3.4  | 4.64 | 3.56 | 3.68 |      |      |      |      |      |      |
| QMF20276 | Last Minute Site          |     |   |     |   |      |      |      |      |      | 4.44 | 3.3  | 3.44 |      |      |      |      |      |      |
| QMF20461 | Last Minute Site          |     |   |     |   |      |      | 4.06 | 3.03 | 3.32 | 4.31 | 3.53 | 3.54 | 4.68 | 3.61 | 3.45 |      |      |      |
| QMF20469 | Main Site                 |     |   |     |   |      |      | 3.96 | 2.8  | 2.77 | 4.47 | 3.27 | 3.01 |      |      |      |      |      |      |
| QMF56313 | Melody's Maze Site        |     |   |     |   |      |      |      |      |      | 4.47 | 3.78 | 3.81 | 4.55 | 3.6  | 3.39 |      |      |      |
| QMF36572 | NJC8 Site                 |     |   |     |   |      |      |      |      | 3.2  | 4.5  | 3.69 | 3.52 |      |      |      |      |      |      |
| QMF56316 | NJC8 Site                 |     |   |     |   | 6.95 | 3.38 |      |      |      |      |      |      |      |      |      |      |      |      |

TABLE S2. Measurements of the upper dentition of type and referred material of *Ganguroo robustiter* in mms. L = anteroposterior length, AW = anterior width, PW = posterior width, dp = deciduous premolar, p = premolar, m = molar.

| Specimen | Riversleigh Locality | DP2  |      | DP3  |      | P3   |      | L    | M1   |      | L    | M2   |      | L    | M3   |      | L    | M4   |      |
|----------|----------------------|------|------|------|------|------|------|------|------|------|------|------|------|------|------|------|------|------|------|
|          |                      | L    | W    | L    | W    | L    | W    |      | AW   | PW   |
| QMF36338 | AL90 Site            | 4.54 | 2.93 | 4.08 | 3.26 | 7.45 | 3.03 | 4.39 | 4.07 | 3.86 | 4.65 | 4.26 | 4.15 | 5.14 | 3.98 | 3.73 |      |      |      |
| QMF36338 | AL90 Site            | 4.51 | 3.06 | 4.16 | 3.19 | 7.5  | 3.53 |      |      |      | 4.55 | 3.95 | 3.83 | 5.22 | 4.29 | 4.06 |      |      |      |
| QMF41237 | AL90 Site            |      |      |      |      | 7.24 | 3.49 | 4.18 | 4.29 | 3.46 | 4.54 | 4.36 | 3.81 | 4.48 | 4.27 | 3.49 | 4.64 | 4.05 | 3.1  |
| QMF41237 | AL90 Site            |      |      |      |      | 7.14 | 3.19 | 4.18 | 4.25 | 3.67 | 4.34 | 4.32 | 3.63 | 4.59 | 4.19 | 3.49 | 4.7  | 4.04 | 3.08 |
| QMF36359 | AL90 Site            |      |      |      |      | 7.29 | 3.49 | 4.1  | 3.95 | 3.81 | 4.3  | 4.32 | 3.63 | 4.5  | 4.25 | 3.49 | 4.5  | 3.97 | 2.89 |
| QMF36359 | AL90 Site            |      |      |      |      | 7.32 | 3.5  | 4.06 | 3.98 | 3.85 | 4.32 | 4.39 | 3.89 | 4.59 | 4.34 | 3.55 | 4.36 | 3.93 | 2.85 |
| QMF40014 | AL90 Site            |      |      |      |      | 8.28 | 4.1  | 4.44 | 4.18 | 3.97 | 4.59 | 4.39 | 3.94 | 4.82 | 4.3  | 3.86 | 4.49 | 4.05 | 3.45 |
| QMF40014 | AL90 Site            |      |      |      |      | 8.16 | 4.08 | 4.27 | 4.05 | 4.09 | 4.59 | 4.25 | 4.06 | 4.93 | 4.25 | 3.84 | 4.69 | 4.08 | 3.37 |
| QMF30845 | AL90 Site            | 4.14 | 3.48 | 3.69 | 3.56 |      |      | 4.4  | 3.92 | 3.92 | 4.03 | 3.95 | 3.66 |      |      |      |      |      |      |
| QMF30845 | AL90 Site            | 4.45 |      | 3.77 | 3.87 |      |      | 4.44 |      |      |      |      |      |      |      |      |      |      |      |
| QMF56301 | AL90 Site            | 4.56 | 3.43 | 4.28 | 3.72 |      |      | 4.44 | 4.51 | 4.1  | 4.96 | 5.05 | 4.02 |      |      |      |      |      |      |
| QMF56310 | AL90 Site            |      |      |      |      |      |      | 4.02 | 4.22 | 4.07 | 4.33 | 4.33 | 3.83 | 4.55 | 4.51 | 3.86 | 4.11 | 3.97 | 3.03 |
| QMF56298 | AL90 Site            | 4.32 | 3.11 | 4.25 | 3.34 |      |      | 4.33 | 4.04 | 3.56 |      |      |      |      |      |      |      |      |      |
| QMF57287 | AL90 Site            | 4.78 | 3.59 | 4.54 | 3.44 |      |      | 4.77 | 4.06 | 3.97 |      |      |      |      |      |      |      |      |      |
| QMF57287 | AL90 Site            | 4.78 | 3.55 | 4.43 | 3.56 |      |      | 4.66 | 4.15 | 4.07 | 5.25 | 4.31 | 4.07 |      |      |      |      |      |      |
| QMF36478 | AL90 Site            |      |      |      |      |      | 3.9  | 4.4  | 4.04 | 3.6  | 4.76 | 4.22 | 3.83 | 5.05 | 4.53 | 3.71 | 5.21 | 3.92 | 3.01 |
| QMF36478 | AL90 Site            |      |      |      |      | 7.58 | 4.02 | 4.64 | 4.13 | 3.93 | 4.6  | 4.5  | 3.78 | 4.72 | 4.53 | 3.96 | 4.92 | 4.02 | 3.24 |
| QMF30814 | Cleft of Ages 4 Site |      |      |      |      |      |      |      |      |      |      |      |      | 4.39 | 4.28 | 3.85 | 4.5  | 3.99 | 3.3  |
| QMF36256 | Cleft of Ages 4 Site |      |      |      |      | 7.56 | 3.47 |      |      |      |      |      |      |      |      |      |      |      |      |
| QMF20619 | Cleft of Ages 4 Site |      |      |      |      |      |      | 4.67 | 4.43 | 4.27 | 5.14 | 4.86 | 3.64 | 5.25 | 4.84 | 4.01 | 4.8  | 4.56 | 3.33 |
| QMF20586 | Cleft of Ages Site   |      |      |      |      | 7.92 | 3.73 | 4.34 | 4.19 | 3.85 | 4.91 | 4.33 | 3.86 | 4.85 | 4.38 | 3.56 | 4.56 | 3.89 | 2.76 |
| QMF52810 | Dome Site            |      |      |      |      | 7.6  | 3.7  | 4.41 | 4.22 | 4.17 | 4.77 | 4.57 | 4.23 | 5.11 | 4.66 | 3.92 | 5.37 | 4.17 | 3.1  |
| QMF55102 | Encore Site          |      |      |      |      |      |      |      |      |      | 6.09 | 5.72 | 5.13 |      |      |      |      |      |      |
| QMF55106 | Encore Site          |      |      |      |      |      |      |      |      |      |      |      |      |      |      |      | 5.55 | 4.61 | 3.86 |
| QMF55103 | Encore Site          |      |      |      |      | 8.38 | 3.98 |      |      |      |      |      |      |      |      |      |      |      |      |
| QMF55109 | Encore Site          |      |      |      |      |      |      |      |      |      |      |      |      | 6.47 | 5.51 | 5.17 |      |      |      |

TABLE S2. (Continued)

| Specimen | Riversleigh Locality | DP2  |      | DP3  |      | P3   |      | M1   |      |      | M2   |      |      | M3   |      |      | M4   |      |      |
|----------|----------------------|------|------|------|------|------|------|------|------|------|------|------|------|------|------|------|------|------|------|
|          |                      | L    | W    | L    | W    | L    | W    | L    | AW   | PW   |
| QMF55109 | Encore Site          |      |      |      |      |      |      |      |      |      | 5.45 | 5.11 | 4.28 |      |      |      |      |      |      |
| QMF55108 | Encore Site          |      |      |      |      |      |      | 5.16 | 4.68 | 4.25 |      |      |      |      |      |      |      |      |      |
| QMF55108 | Encore Site          |      |      |      |      |      |      |      |      |      |      |      |      |      |      |      | 5.46 | 4.44 | 3.47 |
| QMF55108 | Encore Site          |      |      |      |      |      |      |      |      |      | 5.52 | 4.5  | 4.02 |      |      |      |      |      |      |
| QMF55108 | Encore Site          |      |      |      |      |      |      | 5.01 | 4.34 | 4.06 |      |      |      |      |      |      |      |      |      |
| QMF55108 | Encore Site          |      |      |      |      |      |      | 5.19 |      | 4.78 |      |      |      |      |      |      |      |      |      |
| QMF55108 | Encore Site          |      |      | 4.48 | 4.13 |      |      |      |      |      |      |      |      |      |      |      |      |      |      |
| QMF20526 | Gag Site             | 4.61 | 3.54 | 4.49 | 3.54 |      |      | 4.61 | 3.97 | 3.26 | 4.89 | 3.96 | 3.92 |      |      |      |      |      |      |
| QMF20334 | Gag Site             |      |      |      |      | 7    |      |      |      |      |      |      |      |      |      |      |      |      |      |
| QMF20347 | Gag Site             |      |      |      |      | 7.66 | 3.83 |      |      |      |      |      |      |      |      |      |      |      |      |
| QMF36380 | Gag Site             |      |      |      |      | 7.95 | 4.16 | 4.5  | 4.18 | 4.1  | 4.32 | 4.42 | 4.13 | 4.51 | 4.26 | 3.66 | 4.19 | 3.87 | 2.81 |
| QMF36380 | Gag Site             |      |      |      |      | 8    | 4.14 | 4.28 | 4.17 | 3.83 | 4.52 | 4.39 | 4.08 | 4.4  | 4.32 | 3.8  | 3.99 | 3.9  | 3.09 |
| QMF57005 | Gag Site             |      |      |      |      |      |      |      |      |      | 4.87 | 4.68 | 4.08 | 5.08 |      | 3.86 |      |      |      |
| QMF57005 | Gag Site             |      |      |      |      |      |      | 4.74 | 4.32 | 4.14 | 4.92 | 4.69 | 4.11 | 5.05 | 4.87 | 3.73 | 4.96 | 4.17 | 3.62 |
| QMF56307 | Gag Site             |      |      |      |      | 9.22 | 4.63 | 4.79 | 4.77 | 4.14 | 4.76 | 4.52 | 3.92 |      |      |      |      |      |      |
| QMF31353 | Golden Steph Site    |      |      |      |      |      |      | 4.53 | 4.34 | 4.25 | 4.82 | 4.46 | 4    | 5.06 | 4.48 | 3.77 | 4.57 | 3.99 | 2.9  |
| QMF31353 | Golden Steph Site    |      |      |      |      |      |      |      |      | 4.11 | 4.58 | 4.42 | 3.87 |      |      |      |      |      |      |
| QMF57004 | Henk's Hollow Site   |      |      |      |      | 7.53 | 3.7  | 4.25 | 3.8  | 3.5  | 4.37 | 4.1  | 3.55 | 4.46 | 4.25 | 3.48 | 4.06 | 3.7  | 2.45 |
| QMF20372 | Henk's Hollow Site   |      |      |      |      | 8.61 | 4.69 |      |      |      |      |      |      |      |      |      |      |      |      |
| QMF20405 | Henk's Hollow Site   |      |      |      |      | 7.79 | 4.46 |      |      |      |      |      |      |      |      |      |      |      |      |
| QMF20438 | Henk's Hollow Site   |      |      |      |      | 8.79 | 4.33 |      |      |      |      |      |      |      |      |      |      |      |      |
| QMF20392 | Henk's Hollow Site   |      |      |      |      | 8.4  | 4.31 |      |      |      |      |      |      |      |      |      |      |      |      |
| QMF20352 | Henk's Hollow Site   |      |      |      |      |      |      |      |      |      | 4.61 | 4.42 | 4.16 |      |      |      |      |      |      |
| QMF20552 | Henk's Hollow Site   |      |      |      |      |      |      |      |      |      | 5.09 | 4.72 | 4.36 | 5.15 | 4.63 | 3.98 |      |      |      |
| QMF57011 | Jaw Junction Site    | 4.44 | 3.52 | 4.29 | 3.57 | 7.98 | 4.04 | 4.81 | 4.51 | 4.32 | 5.48 | 5.18 | 4.46 | 5.59 | 5.05 | 4.57 |      |      |      |
| QMF57011 | Jaw Junction Site    | 4.16 | 3.25 | 4.3  | 3.64 |      |      |      |      |      | 5.17 | 4.65 | 4.16 | 5.88 | 4.75 | 3.97 |      |      |      |
| QMF23530 | Jim's Carousel Site  | 4.75 | 3.52 |      | 3.73 |      |      | 4.84 | 4.21 | 4.21 | 5.15 | 4.48 | 4.18 | 5.35 | 4.49 |      |      |      |      |

TABLE S2. (Continued)

| Specimen | Riversleigh Locality      | DP2 |   | DP3  |      | P3   |      | L    | M1   |      | L    | M2   |      | L    | M3   |      | L | M4 |    |
|----------|---------------------------|-----|---|------|------|------|------|------|------|------|------|------|------|------|------|------|---|----|----|
|          |                           | L   | W | L    | W    | L    | W    |      | AW   | PW   |      | AW   | PW   |      | AW   | PW   |   | AW | PW |
| QMF52802 | Keith's Chocky Block Site |     |   |      |      | 7.53 | 3.38 |      |      |      |      |      |      |      |      |      |   |    |    |
| QMF52803 | Keith's Chocky Block Site |     |   |      |      | 7.4  |      |      |      |      |      |      |      |      |      |      |   |    |    |
| QMF52803 | Keith's Chocky Block Site |     |   |      |      | 7.65 |      |      |      |      |      |      |      |      |      |      |   |    |    |
| QMF20530 | Main Site                 |     |   |      |      | 9.04 | 4    |      |      |      |      |      |      |      |      |      |   |    |    |
| QMF57009 | Melody's Maze Site        |     |   |      |      | 9.21 | 4.1  | 4.61 | 4.48 | 4.27 |      |      |      |      |      |      |   |    |    |
| QMF56315 | Rick's Sausage Site       |     |   |      |      | 7.52 | 3.46 |      |      |      |      |      |      |      |      |      |   |    |    |
| QMF57010 | Skull Site                |     |   |      |      |      |      | 4.51 | 4.53 | 4.46 | 5.08 | 5.23 | 4.22 | 5.23 | 4.37 | 3.92 |   |    |    |
| QMF57010 | Skull Site                |     |   | 4.74 | 4.06 |      |      | 4.8  | 4.61 | 4.41 | 5.2  | 4.86 | 4.41 | 5.4  | 4.49 | 4.02 |   |    |    |

TABLE S3. Univariate statistics of type and referred material of *Ganguroo robustiter*. N = number of specimen, Min = minimum measurement, Max = maximum measurement, L = anteroposterior length, AW = anterior width, PW = posterior width, p/P = lower/upper premolar, m/M = lower/upper molar.

|      | N  | Min  | Max  | Mean | Standard error | Variance | Standard deviation | Coefficient of Variation |
|------|----|------|------|------|----------------|----------|--------------------|--------------------------|
| p3L  | 32 | 6.31 | 8.58 | 7.18 | 0.09           | 0.26     | 0.51               | 7.08                     |
| p3W  | 28 | 3.12 | 4.22 | 3.63 | 0.05           | 0.08     | 0.29               | 7.97                     |
| m1L  | 38 | 3.69 | 4.46 | 4.09 | 0.02           | 0.03     | 0.16               | 3.95                     |
| m1AW | 38 | 2.48 | 3.68 | 2.98 | 0.03           | 0.04     | 0.21               | 7.04                     |
| m1PW | 39 | 2.72 | 3.81 | 3.14 | 0.03           | 0.04     | 0.20               | 6.34                     |
| m2L  | 53 | 3.86 | 4.96 | 4.38 | 0.03           | 0.04     | 0.21               | 4.70                     |
| m2AW | 53 | 2.91 | 3.9  | 3.36 | 0.03           | 0.04     | 0.21               | 6.15                     |
| m2PW | 52 | 2.82 | 3.81 | 3.32 | 0.03           | 0.05     | 0.23               | 6.86                     |
| m3L  | 33 | 3.91 | 5.61 | 4.66 | 0.07           | 0.15     | 0.39               | 8.30                     |
| m3AW | 32 | 3.08 | 4.3  | 3.54 | 0.04           | 0.06     | 0.24               | 6.79                     |
| m3PW | 33 | 2.97 | 4.2  | 3.41 | 0.05           | 0.07     | 0.27               | 8.01                     |
| m4L  | 16 | 4    | 5.19 | 4.60 | 0.09           | 0.12     | 0.35               | 7.65                     |
| m4AW | 17 | 2.89 | 3.72 | 3.38 | 0.06           | 0.05     | 0.23               | 6.82                     |
| m4PW | 16 | 2.49 | 3.61 | 3.04 | 0.07           | 0.08     | 0.29               | 9.45                     |
| P3L  | 30 | 7    | 9.22 | 7.89 | 0.11           | 0.37     | 0.61               | 7.72                     |
| P3W  | 28 | 3.03 | 4.69 | 3.87 | 0.08           | 0.18     | 0.42               | 10.83                    |
| M1L  | 34 | 4.02 | 5.19 | 4.52 | 0.05           | 0.09     | 0.29               | 6.47                     |
| M1AW | 32 | 3.8  | 4.77 | 4.24 | 0.04           | 0.05     | 0.23               | 5.52                     |
| M1PW | 34 | 3.26 | 4.78 | 4.01 | 0.05           | 0.10     | 0.31               | 7.79                     |
| M2L  | 36 | 4.03 | 6.09 | 4.82 | 0.07           | 0.18     | 0.43               | 8.86                     |
| M2AW | 36 | 3.95 | 5.72 | 4.52 | 0.06           | 0.14     | 0.38               | 8.38                     |
| M2PW | 36 | 3.55 | 5.13 | 4.03 | 0.05           | 0.09     | 0.30               | 7.34                     |
| M3L  | 28 | 4.39 | 6.47 | 4.99 | 0.09           | 0.23     | 0.48               | 9.64                     |
| M3AW | 27 | 3.98 | 5.51 | 4.48 | 0.06           | 0.10     | 0.31               | 7.01                     |
| M3PW | 27 | 3.48 | 5.17 | 3.86 | 0.07           | 0.12     | 0.35               | 9.08                     |
| M4L  | 20 | 3.99 | 5.55 | 4.68 | 0.10           | 0.21     | 0.45               | 9.71                     |
| M4AW | 20 | 3.7  | 4.61 | 4.07 | 0.05           | 0.05     | 0.23               | 5.66                     |
| M4PW | 20 | 2.45 | 3.86 | 3.14 | 0.07           | 0.11     | 0.33               | 10.48                    |
